# Supplementary material
Source: publisher site journal article supplement (https://www.dovepress.com/article/supplementary_file/542606/542606%20Supplementary%20Material.xlsx)
Supplement: Supplementary file 1 [file 542606%20Supplementary%20Material.xlsx]

## Sheet: Sheet1
Mode of delivery (0 vaginal, 1 cesarean)	Mode of Delivery 1(0: Vaginal, 1: Cesarean, 2: Forceps)	Temperature	Number of hospital admissions	Discharge Days	Age	Preconception BMI	BMI at Delivery	Gravidity	Parity	Postpartum hemorrhage	Gestational Week	CCA clinical chorioamnionitis(0 Absent, 1 Present)	HCA histologic chorioamnionitis (0 present, 1 absent)	HB	WBC	N%	N	CRP1(0≤10,1>10)	CRP	Ureaplasma urealyticum in vaginal discharge(0: absent, 1: present)	Vaginal discharge Ureaplasma urealyticum 0(0: absent, 1: present)	Vaginal discharge Mycoplasma hominis (0 absent 1 present)	Culture of vaginal discharge for other bacteria (0 absent 1 present)	Positive endometrial culture (0 absent 1 present)	Uterine Mycoplasma (0 absent 1 present)	Intrauterine culture for other bacteria 0(0 for none, 1 for presence)	Gram-negative bacilli in the uterine cavity(0 for none, 1 for presence)	Gram-positive bacteria in the uterine cavity(0 for none, 1 for presence)	GBS(0 for none, 1 for presence)	Premature rupture of membranes (0 for none, 1 for present)	Rupture of Membranes Gestational Age	Interval time between PPROM and fever(1 ≤ 24h, 24h<2 ≤ 48h, 3 > 48h)	Artificial Rupture of Membranes (0 for No, 1 for Yes)	Pregnancy anemia(0 for none, 1 for presence)	Hypertensive Disorders in Pregnancy (0: Absent, 1: Present)	Hypertensive Disorders of Pregnancy 0(0: None, 1: Gestational Hypertension, 2: Chronic Hypertension, 3: Preeclampsia)	Hypertensive Disorders in Pregnancy 1(0: None, 1: Gestational Hypertension, 2: Chronic Hypertension, 3: Mild Preeclampsia, 4: Severe Preeclampsia)	Diabetes 0(0 No ;1 GDM)	Diabetes Type 1(0: None, 1: GDMA1,2: GDMA2,3: Diabetes)	Thyroid disease 0(0: None, 1: Present)	Thyroid Disease 1(0 None 1 Hypothyroidism 2 Hyperthyroidism 3 Low T4 Syndrome 4 Hashimoto's 5 Abnormal)	IVF(0 No;1 IVF)	ICP(0 No;1 yes)	FGR(0 No;1Yes)	Antepartum hemorrhage	Placental Abruption	Incision infection	Scarred Uterus	Malposition of the fetus
0	0	38.1	3	6	34	29.7442	33.1648	1	1	385	36.6	1	1	111	22.5	89.8	20.19	1	25	0	0	0	0	0	0	0	0	0	0	1	36.5	1	0	0	1	2	2	0	0	0	0	0	0	0	0	0	0	0	0
0	0	37.8	1	4	39	22.7458	29.156	1	1	300	36.6	0	0	125	18.3	85.3	15.59	0	10	0	0	0	0	0	0	0	0	0	0	1	36.5	2	0	0	0	0	0	0	0	0	0	0	0	0	0	0	0	0	0
1	1	37.8	3	5	28	21.2306	26.2378	1	1	200	36.6	0	0	131	18.4	89.5	16.43	0	8	0	0	0	0	0	0	0	0	0	0	1	36.5	1	0	0	0	0	0	0	0	1	1	0	0	0	0	0	0	0	0
1	1	38	3	12	35	22.0386	25.7484	3	2	150	36.6	1	0	133.4	13.9	92.4	12.81	1	137	0	0	0	0	0	0	0	0	0	0	0			0	0	0	0	0	0	0	0	0	0	0	0	0	0	0	1	0
1	1	37.8	1	7	31	19.721	26.462	1	1	300	36.6	0	0	110	9	80.5	7.2	1	17	0	0	0	0	0	0	0	0	0	0	1	36.5	2	0	0	0	0	0	0	0	1	1	0	0	0	0	0	0	0	0
0	0	38.2	1	5	30	19.4674	23.5078	1	1	240	36.6	1	1	112	20.7	89.9	18.61	1	11	0	0	0	0	1	0	1	0	1	0	1	36.4	3	0	0	0	0	0	0	0	0	0	0	0	0	0	0	0	0	0
1	1	37.8	2	5	28	23.3355	29.4328	1	1	200	36.6	0	0	102	9.8	79.9	7.82	0	7	0	0	0	0	1	0	1	0	1	0	1	36.6	1	0	1	0	0	0	0	0	0	0	0	0	0	0	0	0	0	0
1	1	37.6	2	4	29	23.6614	27.7177	1	1	200	36.5	0	0	127						0	0	0	0	0	0	0	0	0	0	0			0	0	0	0	0	0	0	0	0	0	0	0	0	0	0	0	1
0	0	38	1	3	30	19.1001	23.3242	1	1	265	36.5	1	0	129	15	87.6	13.16	0	4	0	0	0	0	0	0	0	0	0	0	1	36.5	1	0	0	0	0	0	0	0	0	0	0	0	0	0	0	0	0	0
1	1	37.5	1	4	34	19.9219	25.625	2	1	200	36.4	0	0	111	8.3	74.5	6.19			0	0	0	0	0	0	0	0	0	0	1	36.4	1	0	0	0	0	0	0	0	0	0	1	0	0	0	0	0	1	0
1	1	37.5	2	7	30	21.9671	21.8963	1	1	200	36.4	0	0	103	7.7	78.6	6.06	1	12	0	0	0	0	0	0	0	0	0		1	36.4	1	0	1	0	0	0	1	1	0	0	1	0	0	0	0	0	0	0
0	0	37.8	5	6	34	19.4362	24.5065	3	1	330	36.4	0	0	148	19.4	91.2	17.66	1	25	0	0	0	0	0	0	0	0	0	0	1	36.2	3	0	0	0	0	0	0	0	0	0	1	0	0	0	0	0	0	0
1	1	37.7	1	5	28	18.6709	23.7007	1	1	200	36.4	0	1	121	15.8	81.5	12.87	1	43	0	0	0	0	0	0	0	0	0	0	0			0	0	0	0	0	1	1	0	0	0	0	0	0	0	0	0	0
0	0	37.5	1	4	31	18.9181		2	1	230	36.4	0	1	114	10.5	79.5	8.38	0	2	1	0	1	0	0	0	0	0	0	0	1	36.2	1	0	0	0	0	0	0	0	0	0	0	0	0	0	0	0	0	0
1	1	38.4	5	6	35	19.2894	25.462	3	2	200	36.4	1	0	122	9.5	86.6	8.2	1	25	0	0	0	0	0	0	0	0	0	0	0			0	0	0	0	0	0	0	1	4	0	0	0	0	0	0	1	0
0	2	37.6	1	6	24	20.2848	26.1674	1	1	340	36.3	0	0	130	20.1	86.5	17.33	1	11					1	1	0	0	0	0	1	36.2	1	0	0	0	0	0	0	0	0	0	0	0	0	0	0	0	0	0
0	0	37.8	2	6	26	23.4375	31.9531	1	1	430	36.3	0	0	127	17	92.6	15.76	0	4	0	0	0	0	0	0	0	0	0	0	1	36.2	1	0	0	1	3	3	0	0	0	0	0	0	0	0	0	0	0	0
1	1	38	1	4	30	25.9516	33.045	1	1	200	36.3	1	1	121	17.4	84	14.81	0	5	0	0	0	0	0	0	0	0	0	0	1	36.3	1	0	0	1	1	1	0	0	1	3	1	0	0	0	0	0	0	0
0	0	37.8	3	2	29	20.1873	23.3091	1	1	245	36.3	0	1	130	21.4	92.3	19.73	1	11	1	1	0	0	1	1	0	0	0	0	0			0	0	0	0	0	0	0	0	0	0	0	0	0	0	0	0	0
1	1	37.7	2	4	33	24.6904	28.5483	1	1	200	36.3	0	1	101	9.3	84.1	7.83	0	7	0	0	0	0	0	0	0	0	0	1	1	36.2	1	0	1	0	0	0	0	0	0	0	0	0	0	0	0	0	0	0
1	1	38.7	1	6	26	21.1073	27.7855	3	1	200	36.3	1	1	121	10.8	82.7	8.91	0	6	0	0	0	0	0	0	0	0	0	0	1	36.1	2	0	0	0	0	0	0	0	0	0	0	0	0	0	0	0	0	0
0	0	37.8	3	3	33	23.9512	28.9229	2	2	265	36.3	0	1	112	11.3	82.2	9.28	0	9	0	0	0	0	1	0	1	1	0	0	1	36.3	1	0	0	0	0	0	0	0	0	0	0	0	0	0	0	0	0	0
1	1	38.5	1	9	30	19.5312	25.0781	1	1	200	36.1	0	0	115	5.6	70.9	3.95	1	12	0	0	0	0	0	0	0	0	0	0	0			0	0	1	3	4	0	0	0	0	0	0	0	0	0	0	0	0
1	1	37.7	2	5	27	22.231	24.6334	3	2	300	36.1	0	1	119	9.8	87.9	8.58	0	8	0	0	0	0	0	0	0	0	0	0	0			0	0	0	0	0	1	1	0	0	0	0	0	0	0	0	1	0
1	1	37.9	1	5	37	22.6562	28.2812	2	2	200	36.1	0	1	113	9.5	74.5	7.1	0	6	0	0	0	0	0	0	0	0	0		1	36.1	1	0	0	0	0	0	0	0	0	0	0	0	0	0	0	0	1	0
0	0	37.9	1	3	29			1	1	250	36.1	0	1	113	12.7	88.1	11.22	0	9	0	0	0	0	0	0	0	0	0	0	1	36.1	1	0	0	0	0	0	0	0	0	0	0	0	0	0	0	0	0	0
0	0	38	2	4	37			2	2	260	36	0	1	135	12.3	82.5	10.19	0	1	0	0	0	0	0	0	0	0	0		1	35.6	2	0	0	0	0	0	0	0	0	0	0	0	0	0	0	0	0	0
1	1	37.7	1	5	28	26.6728	29.4544	3	1	200	36	0	1	120	10.8	72.8	7.86	1	17	0	0	0	0	0	0	0	0	0	0	1	36	1	0	0	0	0	0	0	0	0	0	1	0	0	0	0	0	0	0
1	1	37.5	1	8	31	19.3792	24.2908	1	1	200	36	0	1	128	22.5	89.1	20.05	1	27					1	1	1	1	0	0	1	35.4	2	0	0	0	0	0	0	0	1	1	0	0	1	0	0	1	0	0
1	1	37.7	1	7	29	22.6003	27.7367	1	1	200	36	0	1	113	16.6	84.7	14.03	1	28	1	1	0	0	0	0	0	0	0	0	0			0	0	0	0	0	0	0	0	0	1	0	0	0	0	0	0	0
1	1	37.6	2	5	38	21.436	31.051	4	2	200	36	0	1	114	15.2	89.5	13.62												0	1	36	1	0	0	0	0	0	0	0	0	0	0	0	0	0	0	0	1	1
1	1	37.8	1	6	28	23.5294	25.9516	1	1	200	36	0	0	103	19.8	87.5	17.31	1	11	0	0	0	0	1	0	1	0	1	1	0			0	1	0	0	0	1	1	0	0	0	0	0	0	0	0	0	0
0	0	37.8	1	2	28	24.2188	29.9219	1	1	245	35.6	0	1	123	15.5	86.3	13.35	1	40	0	0	0	0	0	0	0	0	0	0	0			0	0	0	0	0	0	0	0	0	0	0	0	0	0	0	0	0
0	0	37.9	1	3	27	20.6612	25.9233	1	1	245	35.6	0	0	116	10.8	78.1	8.44	0	9	1	1	0	0						0	1	35.6	1	0	0	0	0	0	0	0	0	0	0	0	0	0	0	0	0	0
1	1	38	1	9	36	23.4375	27.3828	3	2	200	35.6	0	1	124	13.7	91.6	12.53			1	1	0	0	0	0	0	0	0		0			0	0	0	0	0	0	0	1	1	0	0	0	0	0	0	1	0
1	1	38	1	4	30	20.5499	23.9158	1	1	200	35.6	1	0	139	6.8	78.6	5.32	0	4	0	0	0	0	0	0	0	0	0	0	1	35.6	1	0	0	0	0	0	0	0	0	0	0	0	0	0	0	0	0	0
1	1	37.6	1	6	31	18.7328	23.9853	2	1	300	35.6	0	0	116	10.6	76.1	8.1	0	4										0	1	35.6	1	0	0	0	0	0	0	0	0	0	0	0	0	0	0	0	0	1
0	0	37.6	3	3	26	21.875	27.7344	2	1	260	35.5	0	0	113	14	82.5	11.52	0	<1	0	0	0	0	0	0	0	0	0		1	35.5	1	0	0	0	0	0	1	1	0	0	0	0	0	0	0	0	0	0
1	1	37.5	1	5	33	21.3593	28.6642	1	1	200	35.5	0	1	108	13.2	76.9	10.14	1	31					1	1	0	0	0	0	1	35.5	1	0	1	0	0	0	0	0	0	0	0	0	0	0	0	0	0	0
1	1	39.5	2	6	32	19.5965	22.2093	1	1	200	35.5	1	0	124	8.5	79.6	6.77	1	31	1	1	0	0	0	0	0	0	0	0	0			0	0	0	0	0	0	0	1	2	0	0	0	0	0	0	0	0
1	1	37.7	1	5	37			4	1	200	35.4	0	1	110	17.8	84.8	15.12	1	46	1	1	0	0	0	0	0	0	0	0	1	35.4	1	0	0	0	0	0	0	0	1	3	0	0	0	0	0	0	0	0
0	0	37.6	1	4	24	16.3721	23.7228	2	1	300	35.3	0	0	126	10.4	75.1	7.81			0	0	0	0	0	0	0	0	0	0	1	35.2	1	0	0	0	0	0	0	0	0	0	0	0	0	0	0	0	0	0
0	0	37.7	1	3	31	18.6709	24.8057	1	1	200	35.2	0	1	119	13.9	85.7	11.88	0	3	0	0	0	0	0	0	0	0	0		1	35.1	1	0	0	0	0	0	0	0	0	0	0	0	0	0	0	0	0	0
1	1	37.9	1	6	26			1	1	200	35.2	0	0	129	12.2	80.1	9.77	0	8	0	0	0	0	0	0	0	0	0		0			0	0	0	0	0	0	0	0	0	0	0	0	0	0	0	0	0
0	0	38	1	5	30	25.6489	32.8648	2	1	150	35.2	0	0	114	14.1	81.9	11.57	1	12	0	0	0	0	1	0	1	1	1	0	0			0	0	0	0	0	0	0	1	3	0	0	0	0	0	0	0	0
1	1	38	1	6	22	17.6471		2	1	200	35.1	1	0	116	8.8	83.6	7.32	1	11	0	0	0	0	0	0	0	0	0		0			0	0	0	0	0	0	0	0	0	0	0	0	0	0	0	0	0
0	0	37.7	1	5	27	23.1473	30.13	1	1	370	35	0	0	133	23	94.8	21.77	0	3	0	0	0	0	0	0	0	0	0	0	1	34.6	1	0	0	0	0	0	0	0	0	0	0	0	0	0	0	0	0	0
1	1	37.5	2	5	39	24.3496	29.3477	3	2	200	34.5	0	0	140	9.5	78.7	7.48	0	8	0	0	0	0	0	0	0	0	0		0			0	0	1	1	1	1	1	0	0	0	0	0	0	0	0	1	0
0	0	37.6	1	3	32	23.8054	28.2635	2	1	320	34.5	0	1	99	20.2	90.7	18.31	1	31	0	0	0	0	0	0	0	0	0	1	1	34.4	1	0	1	0	0	0	0	0	0	0	0	0	0	0	0	0	0	0
1	1	37.5	1	6	27	19.1001	22.2222	1	1	200	34.5	0	0	124	8.9	81.4	7.27	0	5											0			0	0	0	0	0	0	0	0	0	0	0	0	1	0	0	0	0
1	1	38.7	2	11	33	21.0938	24.8047	3	2	200	33.6	1	0	102	7.9	75.5	5.95	1	51	0	0	0	0	0	0	0	0	0		0			0	1	0	0	0	0	0	0	0	0	0	0	0	0	0	0	0
1	1	37.7	1	9	35	16.7311	21.1927	1	1	200	33.4	0	1	114	17.5	79.8	13.95	0	3	1	1	0	0	0	0	0	0	0		1	33.1	3	0	0	0	0	0	0	0	0	0	0	0	0	0	0	0	0	0
1	1	38.2	1	9	42			4	2	400	33.3	1	1	119	18.4	86.2	15.91	1	28	0	0	0	0	1	0	1	0	1	1	1	33.3	1	0	0	0	0	0	1	2	0	0	1	0	0	0	0	0	1	0
1	1	37.8	2	12	37	18.9866	24.5243	5	2	200	32.6	0	1	103	20	90.2	18.02	1	31	0	0	0	0	0	0	0	0	0	0	1	32	3	0	1	0	0	0	0	0	0	0	0	0	0	0	0	0	0	0
1	1	37.7	1	7	32			2	2	200	32.2	0	0	127	11.9	85.7	10.21	1	103	1	1	0	0	1	1	0	0	0	0	1	32.2	1	0	0	0	0	0	1	2	0	0	0	0	0	0	0	0	0	0
1	1	38.8	1	15	33	20.83		2	2	300	31.1	0	0	126	9.7	86.5	8.42	1	65	0	0	0	0	1	0	1	0	1	0	0			0	0	0	0	0	0	0	0	0	0	0	0	0	0	0	1	0
1	1	38.2	2	27	36			1	1	200	31	1	1	109	21.8	91.3	19.9	1	12	1	1	0	0	0	0	0	0	0	0	1	28.2	3	0	1	0	0	0	1	1	0	0	0	0	0	0	0	0	0	0
1	1	37.8	1	9	23			1	1	200	30.2	0	1	95	18.9	83.5	15.78	1	14	1	1	1	0	0	0	0	0	0	0	1	30	3	0	1	0	0	0	1	1	0	0	0	0	0	0	0	0	0	1
0	0	37.8	1	5	26	28.2284	32.3309	1	1	380	28.6	0	1	129	11.1	78.6	8.71	1	42	1	1	1	0	1	1	0	0	0		1	28.3	3	0	0	0	0	0	0	0	0	0	0	0	0	0	1	0	0	0
1	1	38	4	4	35	21.0962		3	2	200	36.2	1	0	109	11.7	74.8	8.76			0	0	0	0	0	0	0	0	0	0	1	36.2	1	0	1	0	0	0	1	1	0	0	0	0	0	0	0	0	0	0
1	1	38.1	2	5	27	22.2656	26.3281	2	1	200	33.4	0	0	118	13.7	88	12.04	1	46	0	0	0	0	1	1	0	0	0	0	1	33.4	1	0	0	0	0	0	0	0	0	0	1	0	0	0	0	0	0	0
1	1	37.8	1	14	41			4	2	200	28.2	0	1	119	16.9	85.9	14.53	1	40	1	1	1	0	1	1	0	0	0		1	21.2	3	0	0	0	0	0	0	0	0	0	0	0	0	0	0	0	1	0
1	1	38.4	1	6	34	24.1672	29.5211	2	1	200	36.6	0	0	137	13.5	86.5	11.67	0	3	0	0	0	0	0	0	0	0	0	0	0			0	0	0	0	0	0	0	0	0	0	0	0	0	0	0	0	0
0	0	37.9	1	6	33	23.9361	28.845	1	1	425	36.6	0	0	140	17.1	91	15.58	0	3	0	0	0	0	0	0	0	0	0		1	36.5	2	0	0	0	0	0	1	1	0	0	0	0	0	0	0	0	0	0
1	1	37.5	1	6	32	19.5717	24.9915	2	1	200	36.6	0	0	109	8.7	71.9	6.24	0	4	0	0	0	0	0	0	0	0	0	0	0			0	1	0	0	0	0	0	0	0	0	0	1	0	0	0	0	0
0	0	37.9	1	3	32	22.0386	27.034	1	1	385	36.6	0	0	149	16.6	64.2	10.67	1	17	0	0	0	0	0	0	0	0	0	0	1	36.6	1	0	0	1	3	3	0	0	0	0	0	0	0	0	0	0	0	0
0	0	38	2	4	30	18.3655	24.169	1	1	220	36.6	1	1	138	19.3	90.2	17.38	1	21										0	1	36.4	3	0	0	0	0	0	0	0	1	1	0	0	0	0	0	0	0	0
1	1	37.8	2	5	27	26.0146		1	1	200	36.6	0	0	115	7.2	69.8	5	0	7	1	1	0	0	0	0	0	0	0	0	1	36.5	1	0	0	0	0	0	1	1	0	0	0	0	0	0	0	0	0	0
1	1	37.6	1	10	28	18.75		1	1	200	36.6	0	1	112	13	81.1	10.55	1	18	0	0	0	0	0	0	0	0	0	0	1	36.4	2	0	0	0	0	0	0	0	1	3	0	0	0	0	0	0	0	0
0	0	37.7	1	4	27	22.8928	30.3018	1	1	450	36.6	0	1	113	13.1	80.2	10.51	0	7					1	1	0	0	0	0	1	36.5	1	0	0	0	0	0	0	0	0	0	0	0	0	0	0	0	0	0
1	1	38.1	1	5	34	20.7008	26.8734	2	2	200	36.6	0	0	110	11.7	80.3	9.4	1	70	0	0	0	0	0	0	0	0	0	0	0			0	0	0	0	0	0	0	1	5	0	0	0	0	0	0	1	0
1	1	38.1	1	10	32	20.5761	25.9488	1	1	200	36.6	0	0	114	14.3	83.3	11.88	1	21					1	1	0	0	0	0	1	36.3	3	0	0	0	0	0	0	0	0	0	0	0	0	0	0	0	0	0
0	0	37.9	2	5	29	20.7008	26.9111	1	1	320	36.6	0	1	116	14.2	87.3	12.39	1	28	1	1	0	0	1	0	1	1	0	0	0			0	0	0	0	0	0	0	0	0	0	0	0	0	0	0	0	0
1	1	37.9	3	6	28	23.5883	24.677	2	1	200	36.6	0	1	102	8.7	76.8	6.7	1	16	0	0	0	0	0	0	0	0	0	0	1	36.6	1	0	1	0	0	0	0	0	1	1	0	0	0	0	0	0	0	0
0	0	38	1	3	34	21.0641	29.1202	1	1	290	36.5	1	0	135	14.6	76	11.12	0	7	1	1	0	0	1	1	0	0	0	0	1	36.5	1	0	0	0	0	0	0	0	0	0	1	0	0	0	0	0	0	0
0	0	37.9	1	4	28	23.1533	28.0404	1	1	370	36.5	0	1	116	20.5	87.5	17.94	1	63	0	0	0	0	0	0	0	0	0	0	0			0	0	0	0	0	0	0	0	0	0	0	0	0	0	0	0	0
1	1	37.5	2	7	28	26.0375	32.9274	1	1	200	36.5	0	0	120	10.4	82	8.53	0	10	0	0	0	0	0	0	0	0	0	0	1	36.4	1	0	0	0	0	0	0	0	0	0	0	0	0	0	0	0	0	0
0	0	37.7	1	4	29	16.0037	21.7955	1	1	410	36.5	0	0	137	8.2	76.3	6.22	0	5	1	1	0	0	1	0	1	1	0	0	1	36.5	1	0	0	0	0	0	0	0	0	0	0	0	0	0	0	0	0	0
0	0	37.7	1	4	31	19.7239	24.0385	1	1	255	36.5	0	0	125	18.4	88.9	16.36	0	6	0	0	0	0	0	0	0	0	0	0	1	36.5	1	0	0	0	0	0	0	0	0	0	0	0	0	0	0	0	0	0
0	0	37.6	1	3	29	24.3418	28.4799	2	1	220	36.5	0	1	132	19.6	87.9	17.23	0	10	0	0	0	0	0	0	0	0	0	0	1	36.5	1	0	0	0	0	0	0	0	1	5	0	0	0	0	0	0	0	0
1	1	38	2	4	27	18.3594	24.8438	1	1	200	36.5	1	1	145	15.8	89.5	14.18	0	<1	0	0	0	0	0	0	0	0	0	0	0			0	0	0	0	0	0	0	1	1	0	0	0	0	0	0	0	0
1	1	38.1	1	8	27	20.3244	26.3089	2	1	200	36.5	1	1	123	15.8	86.6	13.66	1	39	0	0	0	0	0	0	0	0	0	0	1	36.3	1	0	0	0	0	0	0	0	0	0	0	0	0	0	0	0	0	0
0	0	37.8	1	3	29	22.2291	27.7692	1	1	335	36.5	0	0	114	9.5	71.1	6.77	0	5	0	0	0	0	1	0	1	1	1		1	36.5	1	0	0	0	0	0	0	0	0	0	0	0	0	0	0	0	0	0
0	0	38.2	1	3	28	20.0288	25.1963	1	1	220	36.4	1	1	129	23.3	90.5	21.12	0	10	0	0	0	0	0	0	0	0	0	1	1	36.3	1	0	0	0	0	0	0	0	0	0	0	0	0	0	0	0	0	0
1	1	38	1	6	31	24.5603	29.7355	1	1	200	36.4	0	0	116	12	71.4	8.59	0	3	0	0	0	0	0	0	0	0	0	0	1	36.4	1	0	0	0	0	0	0	0	0	0	0	0	0	0	0	0	0	0
1	1	37.5	1	4	29	22.0386	26.7769	2	1	200	36.4	0	1	124	9.6	61	5.82	0	3	0	0	0	0	0	0	0	0	0	0	1	36.4	1	0	0	0	0	0	1	1	0	0	0	0	0	0	0	0	0	0
0	0	37.7	1	4	29	20.8117	27.3881	1	1	270	36.4	0	0	127	19.2	84.7	16.25	1	19					1	1	0	0	0	0	1	36.3	1	0	0	0	0	0	1	1	0	0	0	0	0	0	0	0	0	0
0	0	37.8	1	4	27	17.239	21.9037	2	1	310	36.3	0	0	120	11.7	80.9	9.48	0	5	0	0	0	0	0	0	0	0	0	0	1	36.2	1	0	0	0	0	0	0	0	0	0	0	0	0	0	0	0	0	0
0	0	37.7	1	4	31	19.415	23.4795	1	1	260	36.3	0	0	110	19.4	87.8	17.05	0	8	0	0	0	0	0	0	0	0	0		1	36.2	1	0	0	0	0	0	0	0	0	0	0	0	0	0	0	0	0	0
0	0	38.3	2	5	33	22.3214	27.6361	1	1	425	36.3	1	1	126	18.7	75.7	14.13	1	11	0	0	0	0	1	0	1	1	0	0	1	36.3	1	0	0	0	0	0	0	0	0	0	1	0	0	0	0	0	0	0
1	1	38	1	9	22	20.7756	26.6188	1	1	300	36.3	1	1	98	15	85.6	12.88	1	14	1	1	0	0	1	1	0	0	0	0	1	35.5	3	0	1	0	0	0	0	0	0	0	0	0	0	0	0	0	0	0
1	1	38.5	4	12	30	26.0375	30.4038	2	1	200	36.2	1	0	110	9	69.7	6.3	0	4	1	1	0	0	0	0	0	0	0	0	0			0	0	0	0	0	1	2	0	0	1	0	0	0	0	0	0	0
0	0	37.5	1	6	32	23.1834	28.2007	1	1	255	36.2	0	1	121	16.6	84.8	14.06	1	13	0	0	0	0	0	0	0	0	0	0	0			1	0	0	0	0	0	0	0	0	0	0	0	0	0	0	0	0
0	0	38.2	2	3	33	26.5625	31.5625	1	1	360	36.2	1	1	128	18.4	87.3	16.1	1	32	0	0	0	0	0	0	0	0	0	0	1	36.2	1	0	0	0	0	0	0	0	0	0	0	0	0	0	0	0	0	0
1	1	38.1	2	5	28	24.3865	27.13	2	2	300	36.2	1	0	114	7.5	88.1	6.64	1	21	0	0	0	0	0	0	0	0	0		0			0	0	0	0	0	0	0	0	0	0	0	0	0	0	0	1	0
0	0	37.9	1	5	27	21.0772	27.5509	1	1	300	36.2	0	1	102	9.9	76.8	7.6	1	11	0	0	0	0	0	0	0	0	0	0	1	36.1	1	0	1	0	0	0	0	0	0	0	0	0	0	0	0	0	0	0
0	0	37.9	1	5	30	19.6283	26.398	2	1	420	36.2	0	0	105	14.8	88.1	13.06	1	20	0	0	0	0	1	0	1	1	0	0	1	36	2	0	1	0	0	0	0	0	0	0	0	0	0	0	0	0	0	0
1	1	38.5	2	6	31	19.2277	25.2363	1	1	200	36.2	1	0	120	17.2	86.6	14.87			0	0	0	0	0	0	0	0	0		0			0	0	0	0	0	0	0	0	0	0	0	0	0	0	0	0	0
0	0	38.1	1	3	30	22.5827	27.2874	1	1	250	36.2	1	0	124	15.3	81	12.43	1	17	0	0	0	0	0	0	0	0	0	0	1	36.1	1	0	0	0	0	0	0	0	0	0	0	0	0	0	0	0	0	0
0	0	37.7	2	3	35	24.8016	29.8682	2	2	330	36.2	0	0	111	8	79.6	6.38	0	8	0	0	0	0	0	0	0	0	0	0	1	36.2	1	0	0	0	0	0	0	0	0	0	0	0	1	0	0	0	0	0
0	0	38	1	7	32	22.3133	25.64	2	1	250	36.2	1	0	117	18.6	89.1	16.54	0	9	0	0	0	0	1	0	1	0	1	0	1	36.2	1	0	0	0	0	0	0	0	0	0	0	0	0	0	0	0	0	0
0	0	37.9	1	4	23	16.937	21.2654	1	1	430	36.1	0	0	101	15.9	87.8	13.99	0	4	0	0	0	0	1	0	1	1	0	0	1	36	1	0	1	0	0	0	0	0	0	0	0	0	0	0	0	0	0	0
0	0	37.6	1	3	27	23.4236	27.6249	1	1	420	36.1	0	1	124	13.4	88.4	11.89	0	8	0	0	0	0	0	0	0	0	0		1	36	1	0	0	0	0	0	0	0	0	0	0	0	0	0	0	0	0	0
0	0	37.9	1	3	28	22.9591	28.1155	1	1	270	36	0	0	115	6.1	80	4.84	0	9	0	0	0	0	0	0	0	0	0	0	1	36	1	0	0	0	0	0	0	0	0	0	0	0	0	0	0	0	0	0
0	2	38	1	7	35	24.1672	32.5327	4	1	315	36	1	1	125	18.9	86.5	16.36	1	32	0	0	0	0	1	0	1	1	0	0	1	35.5	2	0	0	0	0	0	0	0	0	0	0	0	0	0	0	0	0	0
1	1	37.7	1	6	27	20.9572	23.6244	1	1	200	36	0	1	106	6.4	76.9	4.88	0	9	0	0	0	1	0	0	0	0	0	1	0			0	1	0	0	0	0	0	0	0	0	0	0	0	0	0	0	1
1	1	38.2	1	5	28	20.9573	25.5882	1	1	200	35.6	1	0	115	4.9	60.1	2.93	0	6	0	0	0	0	0	0	0	0	0		0			0	0	1	3	4	0	0	0	0	0	0	1	0	0	0	0	0
1	1	37.8	1	9	29	20.83	27.2392	1	1	200	35.6	0	1	122	18.8	86.4	16.23	0	4	0	0	0	0	1	0	1	1	0		1	35.5	2	0	0	0	0	0	0	0	0	0	0	0	0	0	0	0	0	0
0	0	37.6	1	4	23	18.026	24.1548	2	1	220	35.5	0	0	113	9.3	69.6	6.49	0	<1	0	0	0	0	0	0	0	0	0	0	1	35.4	1	0	0	0	0	0	0	0	0	0	0	0	0	0	0	0	0	0
1	1	37.7	1	4	27	19.2336		1	1	200	35.5	0	0	108	13.9	80.4	11.15			0	0	0	0	0	0	0	0	0		0			0	1	0	0	0	0	0	0	0	0	0	0	1	1	0	0	0
0	0	37.7	2	3	35	19.3821	23.6937	1	1	240	35.5	0	1	102	11.2	89	9.93	1	11	0	0	0	0	0	0	0	0	0	0	1	35.5	1	0	1	0	0	0	0	0	0	0	0	0	0	0	0	0	0	0
1	1	37.8	2	11	34	23.3887	30.706	2	2	3860	35.5	0	0	116	6.77	82.7	5.58	1	33	0	0	0	0	0	0	0	0	0		0			0	0	0	0	0	0	0	0	0	0	0	0	0	0	0	0	0
1	1	38.2	1	4	30	20.2812	24.6755	1	1	200	35.5	0	0	130	12.8	85.2	10.94	0	3	0	0	0	1	0	0	0	0	0	1	1	35.5	1	0	0	0	0	0	0	0	0	0	1	0	0	0	0	0	0	0
0	0	37.5	2	8	30	28.6501	30.0092	2	1	380	35.5	0	0	122	16.7	84.6	14.15	1	43	0	0	0	0	1	0	1	1	0		1	35.5	2	0	0	1	3	3	1	1	0	0	0	0	0	0	0	0	0	0
0	0	37.9	2	4	34	19.1406	25.9766	2	2	460	35.4	0	1	113	10.1	78.6	7.93	0	2	1	1	0	0	0	0	0	0	0	0	1	35.4	1	0	0	1	3	3	1	1	0	0	0	0	0	0	0	0	0	0
0	0	37.7	1	3	32	19.7239		2	1	340	35.4	0	1	116	26.4	94.5	24.94	1	13					1	1	0	0	0	0	1	35.4	1	0	0	0	0	0	0	0	1	3	0	0	0	0	0	0	0	0
0	0	37.5	1	2	31	21.2306	24.6355	2	2	205	35.4	0	0	122	11	73.3	8.07	0	<1	0	0	0	0	0	0	0	0	0		0			0	0	0	0	0	1	1	1	4	0	0	0	0	0	0	0	0
1	1	38.6	2	5	33	27.5873	30.63	1	1	300	35.3	1	1	121	22.5	93.3	20.96	1	28	0	0	0	0	0	0	0	0	0	0	0			0	0	0	0	0	0	0	0	0	0	0	0	0	0	0	0	0
1	1	37.7	1	5	27	20.8325	24.7676	1	1	250	35.3	0	1	107	7.9	69.8	5.53	1	17	0	0	0	0	0	0	0	0	0		1	35.2	1	0	1	0	0	0	1	1	0	0	0	0	0	0	0	0	0	0
0	0	37.8	1	2	31	19.1001	24.4261	1	1	320	35.3	0	1	120	13.9	88.3	12.24	1	20	0	0	0	0	0	0	0	0	0	0	1	35.3	1	0	0	0	0	0	0	0	0	0	0	0	0	0	0	0	0	0
0	0	37.7	1	4	30	18.1449	23.6972	2	1	230	35.2	0	1	119	12.4	88.8	10.99	0	7	0	0	0	0	0	0	0	0	0		0			1	0	0	0	0	0	0	0	0	0	0	0	0	0	0	0	0
1	1	38.3	1	7	37	20.2812	26.3656	4	2	200	35.2	1	0	112	11.5	92.5	10.67	0	7	0	0	0	0	0	0	0	0	0		0			0	0	0	0	0	0	0	0	0	0	0	0	0	0	0	1	0
1	1	38.5	2	4	33	17.6898	23.3355	2	2	200	35.2	1	1	110	10.6	90.3	9.61	1	36	0	0	0	0	0	0	0	0	0		0			0	0	0	0	0	0	0	0	0	0	0	0	0	0	0	1	0
0	0	37.6	1	6	31	19.9594	26.5278	4	2	220	35.1	0	1	101	11.8	78.7	9.3	1	28					1	1	0	0	0	1	1	34.5	3	0	1	0	0	0	0	0	1	1	0	0	0	0	0	0	0	0
0	0	37.6	1	4	40			1	1	220	35	0	0	133	11.5	74.5	8.58	0	3	0	0	0	0	0	0	0	0	0	0	1	35	1	0	0	1	3	4	1	1	0	0	0	0	1	0	0	0	0	0
1	1	37.5	1	6	24	22.8928	27.0552	1	1	300	35	0	0	111	9.1	73	6.65	0	4	1	1	0	0	0	0	0	0	0	0	0			0	0	0	0	0	0	0	0	0	0	0	0	0	0	0	0	0
1	1	37.7	3	4	37	24.6094	27.3047	4	2	200	35	0	0	100	11.4	72.1	8.25	0	8	0	0	0	0	0	0	0	0	0		0			0	1	0	0	0	1	1	0	0	0	0	0	0	0	0	1	0
0	0	38.4	2	7	30	22.0317	25.7971	1	1	700	34.6	1	1	124	19.5	85.7	16.74	1	12	1	1	1	0	1	1	1	1	1	0	1	34.4	3	0	0	0	0	0	1	1	0	0	0	0	0	0	0	0	0	0
1	1	37.9	3	5	31	22.8329	24.8758	2	2	200	34.4	0	1	117	12.7	90	11.47	0	6	0	0	0	0	0	0	0	0	0		0			0	0	0	0	0	1	1	0	0	0	0	0	0	0	0	1	0
1	1	37.6	1	5	31	21.4844	26.4453	1	1	200	34.3	0	0	129	9.5	73.7	6.96	1	33	0	0	0	0	0	0	0	0	0	0	1	34.2	1	0	0	0	0	0	1	1	1	1	0	0	0	0	0	0	0	0
0	0	37.6	1	3	27	25.8372	28.6012	1	1	370	34.2	0	0	122	14.4	83.1	11.93	1	14	1	1	0	0	0	0	0	0	0	1	1	34.2	1	0	0	0	0	0	1	1	0	0	0	0	0	0	0	0	0	0
0	0	37.5	1	2	25	20.83	24.8358	1	1	285	34.2	0	0	105	4.5	65.4	2.95	0	4	0	0	0	0	0	0	0	0	0	0	1	34.2	1	0	1	0	0	0	0	0	0	0	0	0	1	0	0	0	0	0
1	1	37.7	1	10	24	21.2585	27.6006	1	1	200	33.3	0	1	105	13.4	81.1	10.97	1	12	1	1	0	0	1	1	0	0	0	0	1	32.6	3	0	1	0	0	0	0	0	0	0	0	0	0	0	0	0	0	0
1	1	38.7	2	12	26	21.875		1	1	200	33.3	1	1	125	15.1	78.6	11.88	0	9	1	1	0	0	1	0	1	1	0		1	32.5	3	0	0	0	0	0	0	0	0	0	0	0	0	0	0	0	0	0
0	0	37.9	3	2	31	24.841	26.7229	3	2	170	33.2	0	0	116	7.5	80.3	6.06	0	5	0	0	0	0	1	0	1	1	0	0	0			1	0	0	0	0	0	0	0	0	0	0	0	0	0	0	0	0
0	0	37.6	1	6	35	19.5799	20.9644	1	1	195	33.1	0	1	130	13.9	77.5	10.77	0	5	0	0	0	0	0	0	0	0	0	0	1	32.5	3	0	0	0	0	0	0	0	0	0	0	0	0	0	0	0	0	0
1	1	39	1	10	31	23.0469	28.9062	3	2	200	33.1	1	0	106	13.4	77.5	10.36	1	120	1	1	0	0	0	0	0	0	0		0			0	1	0	0	0	1	1	0	0	0	0	0	0	0	0	1	0
0	0	38	1	6	31	20.1951	24.0055	1	1	380	32.6	0	0	103	9.1	81.3	7.41	0	6	0	0	0	0	0	0	0	0	0		0			0	1	1	1	1	0	0	1	1	0	0	0	0	0	0	0	0
1	1	37.5	4	8	34	20.7967	26.8923	1	1	300	32.5	0	0	126	8.4	85.4	7.17			0	0	0	0	0	0	0	0	0		0			0	0	0	0	0	0	0	0	0	0	0	0	0	0	0	0	0
1	1	37.6	1	7	30	19.5556	22.6667	2	1	300	32.1	0	0	128	9.8	61.2	6	0	3	0	0	0	0	0	0	0	0	0		0			0	0	0	0	0	0	0	1	5	0	0	1	0	0	0	0	0
0	0	37.7	2	25	29	17.9089		5	2	435	31.5	0	1	102	10.6	83.8	8.84	0	<1	1	1	0	0	0	0	0	0	0	0	1	28.3	1	0	1	0	0	0	0	0	0	0	0	0	0	0	0	0	0	0
0	0	37.5	1	3	33			1	1	160	31.2	0	1	113	21	94.3	19.75	1	22	1	1	0	0	0	0	0	0	0		0			0	0	0	0	0	1	1	0	0	0	0	0	0	0	0	0	0
1	1	38.2	1	15	38			3	2	200	30.5	1	1	129	16.9	85.4	14.4	1	14	0	0	0	0	1	0	1	1	0		1	29.1	3	0	0	0	0	0	1	1	0	0	1	0	0	0	0	0	1	0
1	1	37.6	1	7	24	18.4425	23.072	1	1	200	30.3	0	0	115	16.6	87.1	14.43	0	7	0	0	0	0	0	0	0	0	0		0			0	0	0	0	0	0	0	0	0	0	1	1	0	0	0	0	0
0	0	38.9	1	6	31	25.0657	30.6131	1	1	265	30.2	0	0	111	12.4	81.9	10.18	1	49	0	0	0	0	0	0	0	0	0		0			0	0	0	0	0	0	0	0	0	0	0	0	0	0	0	0	0
0	0	38	3	4	29	22.9568		2	1	230	30.1	0	1	125	12	82.8	9.92	1	34	1	1	0	0	1	0	1	1	0	0	1	30	1	0	0	0	0	0	0	0	1	1	0	0	0	0	0	0	0	0
1	1	37.7	1	6	34	17.8506	22.3133	2	1	200	30	0	1	143	21	87.6	18.36			0	0	0	0	0	0	0	0	0		1	30	1	0	0	0	0	0	0	0	0	0	0	0	0	0	0	0	0	1
0	0	37.6	1	7	31	18.6709	21.8717	1	1	190	28.2	0	0	131	19.8	84.8	16.81	0	5	1	1	0	0	0	0	0	0	0	0	1	28.2	1	0	0	0	0	0	0	0	0	0	0	0	0	0	0	0	0	0
1	1	37.6	1	15	25	20.9366	25.3444	3	1	300	33.3	0	0	139	9.4	88.9	8.36	1	122	0	0	0	0	1	0	1	1	0		0			0	0	0	0	0	0	0	0	0	0	0	0	0	0	1	0	0
1	1	37.5	1	24	31	22.6409	26.7846	1	1	200	29.4	0	1	98	19	88.2	16.76	0	4	0	0	0	0	1	0	1	1	0	0	1	29.2	3	0	1	0	0	0	0	0	0	0	0	0	0	0	1	1	0	0
0	0	38.3	1	2	31	18.3594	22.3047	2	2	275	36.6	0	1	107	11.3	82	9.29	0	6	0	0	0	0	0	0	0	0	0	0	1	36.5	2	0	1	0	0	0	1	1	0	0	0	0	0	0	0	0	0	0
0	2	38.4	2	5	34	23.2335	27.8801	1	1	250	36.6	1	0	115	10.3	87.6	8.99	0	6	0	0	0	0	1	0	1	1	0	0	1	36.6	1	0	0	0	0	0	1	1	0	0	1	0	0	0	0	0	0	0
0	0	37.6	3	3	31	18.75	23.4375	1	1	245	36.6	0	0	135	15.3	93.2	14.26	0	3	0	0	0	0	0	0	0	0	0	0	1	36.6	1	0	0	0	0	0	0	0	0	0	1	0	0	0	0	0	0	0
0	0	37.9	2	3	30	19.1001	22.5528	2	2	160	36.6	0	0	121	15.6	82.2	12.78	0	6					1	1	0	0	0	0	0			0	0	0	0	0	0	0	1	2	0	0	0	0	0	0	0	0
0	2	38.3	1	6	33	24.8358	29.2421	1	1	310	36.6	1	1	106	13.8	84.4	11.69	0	8	0	0	0	0	1	0	1	1	0	0	1	36.5	1	0	1	0	0	0	1	1	0	0	0	0	0	0	0	0	0	0
0	0	37.7	1	3	31	18.2183	21.0068	1	1	410	36.6	0	0	101	10.9	79.6	8.69	0	4	1	1	0	0	1	0	1	1	0	1	1	36.6	1	0	1	0	0	0	0	0	0	0	0	0	0	0	0	0	0	0
0	0	37.5	2	4	33	27.0993	36.6216	2	2	220	36.6	0	0	131	17.3	87.1	15.1	0	5	0	0	0	0	0	0	0	0	0	0	0			0	0	0	0	0	0	0	0	0	0	0	0	0	0	0	0	0
0	0	37.6	1	4	31	20.1951	24.2722	1	1	450	36.6	0	0	95	17.4	91.9	15.98	0	2	0	0	0	0	0	0	0	0	0	0	1	36.6	1	0	1	0	0	0	0	0	0	0	0	0	0	0	0	0	0	0
0	0	37.8	2	4	31	20.7031	24.5703	3	1	285	36.6	0	1	125	17.2	89.6	15.39	0	8	0	0	0	0	0	0	0	0	0	0	1	36.5	1	0	0	0	0	0	0	0	1	1	0	0	0	0	0	0	0	0
0	0	38	1	4	30	19.9219	25.1172	1	1	180	36.6	0	0	117	13.8	80.7	11.11	0	<1					1	1	1	1	1	0	0			0	0	0	0	0	0	0	0	0	0	0	0	0	0	0	0	0
1	1	37.9	1	4	27	20.0796	26.713	1	1	200	36.6	0	1	111	11	87.7	9.65	1	49	0	0	0	0	0	0	0	0	0	0	0			0	0	0	0	0	0	0	0	0	0	0	0	0	0	0	0	0
1	1	37.7	1	6	29	16.8962	23.8384	1	1	200	36.5	0	1	115	15.2	85.2	12.95	1	19										0	1	36.3	1	0	0	0	0	0	0	0	0	0	0	0	0	0	0	0	0	0
0	0	37.6	1	3	37	16.4062	21.7188	1	1	260	36.5	0	0	118	14.3	92.9	13.3	1	15	0	0	0	0	0	0	0	0	0	0	1	36.4	1	0	0	0	0	0	0	0	0	0	0	0	0	0	0	0	0	0
0	0	38	1	4	29	19.5312	24.4531	1	1	205	36.4	0	1	123	11.7	80.8	9.48	0	8	0	0	0	0	0	0	0	0	0	0	1	36.2	2	0	0	0	0	0	0	0	0	0	0	0	0	0	0	0	0	0
0	0	37.5	1	3	32	25.0223	30.4878	1	1	350	36.4	0	0	128	6.9	66.3	4.59	0	3	0	0	0	0	0	0	0	0	0	0	1	36.4	1	0	0	0	0	0	0	0	1	4	0	0	0	0	0	0	0	0
0	0	37.5	1	4	28	22.0317	29.0018	2	1	280	36.4	0	0	110	20.9	92	19.21	0	4	0	0	0	0	0	0	0	0	0	0	1	36.4	1	0	0	0	0	0	0	0	0	0	0	0	0	0	0	0	0	0
0	0	38	1	4	25	18.8271	22.5925	1	1	340	36.4	1	1	125	15.5	88.1	13.62	1	16					1	1	0	0	0	0	0			0	0	0	0	0	0	0	0	0	0	0	0	0	0	0	0	0
0	0	37.8	1	4	27	27.0051	31.0173	4	2	235	36.4	0	0	116	8.4	70.2	5.89	0	6	1	1	0	0	0	0	0	0	0	0	1	36.4	1	0	0	1	1	1	0	0	0	0	0	0	0	0	0	0	0	0
1	1	37.6	1	5	30	19.8791	27.5468	1	1	200	36.4	0	1	101	8.3	64.8	5.38	0	4	0	0	0	0	0	0	0	0	0	0	1	36.3	1	0	1	0	0	0	0	0	0	0	0	0	0	0	0	0	0	0
0	0	37.6	2	3	33	22.4082	26.9598	3	2	235	36.3	0	0	105	10.6	73.5	7.82	0	6	0	0	0	0	0	0	0	0	0	0	1	36.2	1	0	1	0	0	0	1	1	0	0	0	0	0	0	0	0	0	0
0	2	37.8	1	3	36	18.75	22.5781	1	1	260	36.3	0	0	141	17.7	78.1	13.82	1	15	0	0	0	0	1	0	1	1	1	1	1	36.3	1	0	0	1	3	3	0	0	1	2	0	0	0	0	0	0	0	0
1	1	37.7	1	5	34	22.1828	26.2721	1	1	200	36.3	0	0	122	15	85.5	12.87	0	9	0	0	0	0	0	0	0	0	0	0	0			1	0	0	0	0	0	0	0	0	0	0	0	1	0	0	0	0
1	1	37.7	1	3	42	19.4734	23.5304	2	2	200	36.2	0	0	88	13.6	91.4	12.44	0	2	0	0	0	0	0	0	0	0	0	0	1	36.2	1	0	1	0	0	0	1	1	0	0	0	0	0	0	0	0	0	0
0	2	38.1	2	5	33	22.2063	29.7339	1	1	405	36.2	1	1	118	9	74.6	6.71	0	4	0	0	0	0	0	0	0	0	0	0	0			1	0	0	0	0	0	0	0	0	1	0	0	0	0	0	0	0
0	0	37.9	1	6	29	17.9778	23.0341	1	1	240	36.2	0	1	118	14.6	77.8	11.39	0	4	0	0	0	0	0	0	0	0	0	0	1	36.2	2	0	0	0	0	0	0	0	0	0	0	0	0	0	0	0	0	0
0	0	37.5	2	3	29	24.0238	30.227	1	1	220	36.1	0	1	126	10.2	76	7.74	0	9	0	0	0	0	0	0	0	0	0	0	1	36	1	0	0	0	0	0	1	1	0	0	0	0	0	0	0	0	0	0
0	2	37.5	1	8	28	20.0046	25.5296	1	1	270	36.1	0	0	118	10.7	76.5	8.16	0	8	0	0	0	0	1	1	0	0	0	0	0			0	0	0	0	0	0	0	0	0	0	0	0	0	0	0	0	0
1	1	38	1	4	32	25.2595	29.7924	2	1	200	36.1	0	0	114	14	82.6	11.53	0	3	0	0	0	0	0	0	0	0	0	0	1	36.1	1	0	0	0	0	0	0	0	0	0	0	0	0	0	0	0	0	0
1	1	37.5	1	5	27	21.2585	23.3844	2	1	200	36.1	0	1	97	16.9	88.2	14.88	1	25	1	1	0	0	0	0	0	0	0	0	0			0	1	0	0	0	0	0	0	0	0	0	0	0	0	0	0	0
1	1	37.5	1	6	39	17.4818	23.0177	3	1	200	36.1	0	0	116	7.7	75.7	5.86	0	3	0	0	0	0	0	0	0	0	0		0			0	0	0	0	0	0	0	0	0	0	0	0	0	0	0	0	0
1	1	37.7	1	5	26	19.487	21.4711	1	1	200	36	0	0	101	8.4	69	5.76	0	4	0	0	0	0	0	0	0	0	0	0	1	35.6	1	0	1	0	0	0	0	0	0	0	0	0	0	0	0	0	0	0
0	0	37.8	1	5	32	19.1406	23.9844	1	1	315	35.6	0	0	122	12.1	77.1	9.32	0	3	0	0	0	0	1	0	1	1	0		1	35.6	1	0	0	0	0	0	0	0	1	1	0	0	0	0	0	0	0	0
1	1	38.1	1	6	30	27.6817	33.737	2	1	200	35.6	1	1	110	17	88.9	15.11	1	13	0	0	0	0	0	0	0	0	0	0	1	35.6	1	0	0	0	0	0	0	0	0	0	0	0	0	0	0	0	0	0
1	1	37.5	1	6	30	21.4533	29.0657	1	1	200	35.6	0	1	117	10	76.2	7.64	0	4	0	0	0	0	0	0	0	0	0	0	0			0	0	0	0	0	0	0	0	0	0	0	0	0	0	0	0	0
0	0	37.5	1	5	40	20.0773	24.13	1	1	355	35.4	0	1	124	13.1	83.5	10.91	0	9					1	1	0	0	0	0	1	35.2	2	0	0	0	0	0	0	0	0	0	0	0	0	0	0	0	0	0
1	1	37.5	1	5	38	20.1348	21.7784	3	2	400	35.4	0	1	127	8.4	63.6	5.37	0	5	0	0	0	0	0	0	0	0	0		1	35.3	1	0	0	0	0	0	1	1	0	0	0	0	0	0	0	0	1	0
0	0	37.8	1	4	29	21.7738	28.306	1	1	260	35.4	0	1	115	8.7	80.7	7.05	0	3	0	0	0	0	0	0	0	0	0		1	35.3	1	0	0	0	0	0	0	0	0	0	0	0	0	0	0	0	0	0
0	0	37.7	1	4	33	23.9512	27.9794	2	2	280	35.4	0	1	109	13.3	85.5	11.34	0	4	1	1	0	0	0	0	0	0	0	0	1	35.2	2	0	1	0	0	0	0	0	0	0	0	0	0	0	0	0	0	0
1	1	37.7	1	4	30	15.2416	17.9089	1	1	200	35.3	0	0	113	9.2	81.4	7.51	0	<1	1	1	0	0	0	0	0	0	0	0	1	35.3	1	0	0	0	0	0	1	1	0	0	0	0	0	0	0	0	0	0
1	1	37.5	1	10	31	20.3954	28.3039	2	1	450	35.3	0	0	93	9.8	82.1	8	1	11	0	0	0	0	0	0	0	0	0		0			0	1	0	0	0	0	0	0	0	0	0	0	0	0	0	0	0
0	0	38	1	5	29	20.3125		1	1	350	35.1	1	0	138	18.9	85.8	16.25	0	<1	0	0	0	0	0	0	0	0	0	0	1	35	1	0	0	0	0	0	0	0	0	0	0	0	0	0	0	0	0	0
1	1	37.9	3	8	29	19.8413		2	1	200	35	0	1	139	11.4	75.3	8.6	0	5	0	0	0	0	0	0	0	0	0	0	1	34.6	1	0	0	0	0	0	0	0	0	0	0	0	0	0	0	0	0	0
0	0	37.7	2	3	31	22.9591	27.4756	2	2	230	35	0	0	124	79.4	6.71	13.62	0	<1	0	0	0	0	0	0	0	0	0	0	1	35	1	0	0	0	0	0	1	1	1	1	0	0	0	0	0	0	0	0
0	0	37.5	1	3	25	23.533		1	1	300	35	0	0	104	6.8	76.8	5.25	0	8	0	0	0	0	1	0	1	1	1		1	34.6	1	0	1	1	1	1	0	0	0	0	0	0	0	0	0	0	0	0
1	1	38.2	3	8	31	17.9688		2	1	200	35	1	1	127	20.9	89.1	18.65	0	8	0	0	0	0	1	0	1	1	0		1	34.6	1	0	0	0	0	0	0	0	0	0	1	0	0	0	0	0	0	0
0	2	38	1	7	34	17.3611	28.4864	1	1	390	35	1	0	120	24	85.5	20.7	1	29	0	0	0	1	0	0	0	0	0	1	1	34.5	3	0	0	0	0	0	0	0	0	0	1	0	0	0	0	0	0	0
0	0	37.8	1	4	29	25.0995	30.0118	1	1	270	34.6	0	0	103	15.4	86.8	13.37	0	8	0	0	0	0	0	0	0	0	0	0	1	34.6	1	0	1	0	0	0	0	0	0	0	0	0	0	0	0	0	0	0
1	1	37.9	2	6	37	22.6562	26.5625	3	1	200	34.6	0	1	96	11	84.8	9.32	0	<1	0	0	0	1	0	0	0	0	0	0	1	34.6	1	0	1	0	0	0	0	0	0	0	0	0	0	0	0	0	1	0
1	1	37.8	1	5	26	31.2394		1	1	200	34.6	0	0	121	10.8	77.1	8.33	0	8	0	0	0	0	0	0	0	0	0	0	1	34.6	1	0	0	1	1	1	0	0	0	0	0	0	0	0	0	0	0	1
1	1	37.6	3	6	31	22.7732	26.4463	2	1	700	34.5	0	0	101	10.5	81.1	8.51	0	6	0	0	0	0	0	0	0	0	0	0	1	34.4	1	0	1	0	0	0	0	0	0	0	0	0	0	0	0	0	0	0
0	0	37.7	1	3	30	18.5078	20.5763	1	1	370	34.4	0	1	111	20.8	91.2	18.97	1	29	1	1	0	0	1	1	0	0	0	0	0			0	0	0	0	0	0	0	0	0	0	0	0	0	0	0	0	0
1	1	38	1	9	29	22.4996	28.1971	1	1	200	34.3	1	1	86	12.3	84.8	10.44	0	10	1	1	0	0	1	1	1	1	0	0	1	34.1	3	0	1	0	0	0	0	0	0	0	0	0	0	0	0	0	0	0
1	1	37.6	1	5	40	24.1415	26.3476	2	1	200	34.3	0	0	114	7.8	76.2	5.95	0	10	0	0	0	0	0	0	0	0	0	0	0			0	0	1	3	4	1	1	0	0	0	0	0	0	0	0	0	0
1	1	37.5	3	5	34	19.563		3	1	350	34.3	0	0	140	8.6	71.9	6.19	0	6	0	0	0	0	0	0	0	0	0	0	0			0	0	0	0	0	0	0	0	0	0	0	0	1	1	0	0	0
0	0	37.8	1	4	37	23.8054	28.0038	3	2	370	34.2	0	1	118	14.8	88.8	13.17	0	1	0	0	0	0	0	0	0	0	0		0			0	0	0	0	0	1	1	0	0	0	0	0	0	0	0	0	0
1	1	37.6	1	6	31	21.3039		2	1	200	34.2	0	0	105	5.5	72	3.98	0	4	0	0	0	0	0	0	0	0	0		1	34.2	1	0	1	0	0	0	0	0	0	0	0	0	0	0	0	0	1	0
1	1	38.1	1	6	33	19.2277	20.9902	1	1	200	34.2	0	0	111	7.2	67.9	4.88	0	7	1	1	0	1	0	0	0	0	0	1	1	34.2	1	0	0	1	3	4	0	0	0	0	0	0	1	0	0	0	0	0
0	0	37.8	2	4	37	25.711	30.2599	3	2	330	34.2	0	0	135	10.5	84.8	8.92	1	44	0	0	0	0	0	0	0	0	0	0	0			1	0	0	0	0	0	0	0	0	0	0	0	0	0	0	0	0
0	0	38	2	3	31	21.2279	26.8887	2	1	280	34.1	1	0	127	18.4	85.8	15.79	1	14	1	1	0	1	0	0	0	0	0	0	1	34	1	0	0	0	0	0	0	0	0	0	0	0	0	0	0	0	0	0
0	0	38.4	1	6	31	18.8189	24.0882	1	1	260	34.1	1	0	120	12.8	81.4	10.41	1	11	1	1	0	0	0	0	0	0	0	0	0			0	0	0	0	0	0	0	0	0	0	0	0	0	0	0	0	0
1	1	37.9	2	15	32	22.4059	25.3811	2	1	200	32.6	0	1	129	19.6	91.2	17.83	1	40	0	0	0	0	1	0	1	0	1	0	1	31.2	3	0	0	0	0	0	0	0	1	1	0	0	0	0	0	0	0	0
1	1	38.2	1	12	34	21.875		2	1	200	32.6	1	1	120	19.3	87	16.74	0	10	0	0	0	0	1	0	1	0	1	0	1	32	3	0	0	0	0	0	0	0	0	0	1	0	0	0	0	0	0	0
1	1	37.8	1	7	34	19.6506	26.2292	3	2	200	32.5	0	1	92	18.3	85.4	15.64	1	36	1	1	1	0	1	1	0	0	0		1	32.4	1	0	1	0	0	0	0	0	0	0	0	0	0	0	0	0	1	0
1	1	37.6	3	28	29	18.2563	20.2848	2	1	200	32.3	0	0	121	8.1	71.8	5.78	0	4	1	1	0	0	1	1	1	0	1	0	1	30.1	3	0	0	0	0	0	0	0	1	1	0	0	0	0	0	0	0	0
0	0	37.6	1	3	32	23.4236	26.9557	2	1	370	32.3	0	0	120	21.8	91.9	20.01	0	7	0	0	0	0	1	0	1	1	0	0	0			0	0	0	0	0	0	0	0	0	1	0	0	0	0	0	0	0
1	1	37.8	2	7	32	22.2063		4	2	200	30.6	0	1	115	11.5	80.7	9.3	1	23	0	0	0	0	0	0	0	0	0	0	1	30.4	1	0	0	0	0	0	0	0	0	0	0	0	0	0	0	0	0	0
1	1	37.7	1	10	40	20.1771		1	1	200	30.2	0	0	115	14.5	87.9	12.71	1	29	0	0	0	0	1	1	0	0	0	0	1	29.3	3	0	0	0	0	0	1	1	0	0	0	0	0	0	0	0	0	0
0	0	37.8	1	3	29	25.2595	28.7197	3	1	370	29.6	0	1	106	16.7	90.4	15.07	1	17	1	1	1	0	0	0	0	0	0	0	0			0	1	0	0	0	0	0	0	0	0	0	0	0	0	0	0	0
0	0	38.7	3	6	25	18.3594		2	1	170	29.4	1	1	113	15	94.1	14.15	0	6	0	0	0	0	1	0	1	1	0		1	27.4	3	0	0	0	0	0	1	1	0	0	0	0	0	0	0	0	0	1
1	1	38.5	4	8	39	19.9792	23.1009	2	2	200	29.1	1	1	90	19.2	84.4	16.21	1	15	1	1	0	0	1	0	1	0	1		0			0	1	0	0	0	0	0	0	0	0	0	0	0	0	0	0	1
[truncated: 71 more columns]
